# Supplementary material for: The Effect of Emotional Regulation Skills on Digital Game Addiction in Children Aged 8- 10 in Türkiye: A Cross-Sectional Study
Source: Research Square preprint supplement (doi:10.21203/rs.3.rs-7392297/v1), 2025-09-23
Supplement: Supplementary file 1 [file 53afd7b8e009baefbcc254a3.docx]

STROBE Statement—checklist of items that should be included in reports of observational studies

|  | Item No. | Recommendation | Page  No. | Relevant text from manuscript |
| --- | --- | --- | --- | --- |
| **Title and abstract** | 1 | (*a*) Indicate the study’s design with a commonly used term in the title or the abstract | 1 | The Effect of Emotional Regulation Skills on Digital Game Addiction in Children Aged 8-10 in Türkiye: A Cross Sectional Study |
| (*b*) Provide in the abstract an informative and balanced summary of what was done and what was found | 1 | **Abstract**  Digital game addiction is increasingly prevalent among children, particularly as screen time continues to rise globally… |
| Introduction | | | |  |
| Background/rationale | 2 | Explain the scientific background and rationale for the investigation being reported | 2 | The rapid digitalization of childhood leisure activities has led to a significant rise in digital game use among children, raising growing concerns about the potential for digital game addiction. Recent literature indicates that disregulation in emotional regulation skills is critical in developing and persisting digital game addiction. |
| Objectives | 3 | State specific objectives, including any prespecified hypotheses | 3 | This study aimed to address this gap by investigating the effect of emotional regulation skills on digital game addiction in children aged 8–10 in Türkiye. |
| Methods | | | |  |
| Study design | 4 | Present key elements of study design early in the paper | 4 | Study design |
| Setting | 5 | Describe the setting, locations, and relevant dates, including periods of recruitment, exposure, follow-up, and data collection | 4-6 | Participants, data collection process, instruments |
| Participants | 6 | (*a*) *Cohort study*—Give the eligibility criteria, and the sources and methods of selection of participants. Describe methods of follow-up  *Case-control study*—Give the eligibility criteria, and the sources and methods of case ascertainment and control selection. Give the rationale for the choice of cases and controls  *Cross-sectional study*—Give the eligibility criteria, and the sources and methods of selection of participants | 4 | Participants |
| (*b*)*Cohort study*—For matched studies, give matching criteria and number of exposed and unexposed  *Case-control study*—For matched studies, give matching criteria and the number of controls per case |  |  |
| Variables | 7 | Clearly define all outcomes, exposures, predictors, potential confounders, and effect modifiers. Give diagnostic criteria, if applicable | 6-7 | To evaluate the normality of the data distribution, skewness and kurtosis values were examined. In addition, a binary logistic regression analysis was conducted to investigate the predictive role of emotion regulation skills on the likelihood of digital game addiction. |
| Data sources/ measurement | 8* | For each variable of interest, give sources of data and details of methods of assessment (measurement). Describe comparability of assessment methods if there is more than one group | 5-6 | The Digital Game Addiction Scale for Children was developed by Şahin, Keskin, and Yurdugül (2019) and comprises six items under a unidimensional structure. The Emotion Regulation Scale for Children – Self-Report Form was developed by Rydell, Berlin-Thorell, and Bohlin (2007) and consists of 29 items covering four subdimensions. |
| Bias | 9 | Describe any efforts to address potential sources of bias | 4 | The sample group included 3rd and 4th-grade students enrolled in one selected primary school. The study sample was determined using a non-probability sampling method. |
| Study size | 10 | Explain how the study size was arrived at | 4 | The primary education division of the school comprised 672 students in total, with 336 enrolled in the 3rd and 4th grades. Following the acquisition of informed consent from the students and their parents, 258 students were included in the final sample. |

Continued on next page

| Quantitative variables | 11 | Explain how quantitative variables were handled in the analyses. If applicable, describe which groupings were chosen and why | 6-7 | Data were analyzed using IBM SPSS Statistics for Windows, Version 28. Descriptive statistics—including mean, standard deviation, frequency, and percentage—were calculated to summarize participants’ sociodemographic characteristics, levels of digital game addiction, and emotion regulation skills. |
| --- | --- | --- | --- | --- |
| Statistical methods | 12 | (*a*) Describe all statistical methods, including those used to control for confounding |  |  |
| (*b*) Describe any methods used to examine subgroups and interactions | 6-7 | Group differences in digital game addiction and emotion regulation scores across sociodemographic variables were examined using independent samples t-tests or one-way ANOVA, depending on the number of comparison groups. Post hoc comparisons were performed using Tukey’s HSD test for homogenous variances and the Games-Howell test when variances were unequal. |
| (*c*) Explain how missing data were addressed |  |  |
| (*d*) *Cohort study*—If applicable, explain how loss to follow-up was addressed  *Case-control study*—If applicable, explain how matching of cases and controls was addressed  *Cross-sectional study*—If applicable, describe analytical methods taking account of sampling strategy | 7 |  |
| (*e*) Describe any sensitivity analyses |  |  |
| Results | | | | |
| Participants | 13* | (a) Report numbers of individuals at each stage of study—eg numbers potentially eligible, examined for eligibility, confirmed eligible, included in the study, completing follow-up, and analysed | 4 |  |
| (b) Give reasons for non-participation at each stage | NA |  |
| (c) Consider use of a flow diagram | NA |  |
| Descriptive data | 14* | (a) Give characteristics of study participants (eg demographic, clinical, social) and information on exposures and potential confounders | 7 | The mean age of the children in this study was 9.2 years (SD = 1.0). The majority were female (50.8%). Most participants were in the 4th grade (54.7%) and reported having three siblings (32.9%). The most common household size was five members (32.9%). Regarding parental education, the most frequently reported level for mothers was university education (21.3%), and for fathers, secondary school education (19.8%). In terms of daily technology use, the largest group used technology for 1–2 hours per day (32.2%). The primary purpose of technology use was relaxation (75.2%) |
| (b) Indicate number of participants with missing data for each variable of interest NA |  |  |
| (c) *Cohort study*—Summarise follow-up time (eg, average and total amount) NA |  |  |
| Outcome data | 15* | *Cohort study*—Report numbers of outcome events or summary measures over time |  |  |
| *Case-control study—*Report numbers in each exposure category, or summary measures of exposure |  |  |
| *Cross-sectional study—*Report numbers of outcome events or summary measures | 7-11 |  |
| Main results | 16 | (*a*) Give unadjusted estimates and, if applicable, confounder-adjusted estimates and their precision (eg, 95% confidence interval). Make clear which confounders were adjusted for and why they were included |  |  |
| (*b*) Report category boundaries when continuous variables were categorized | NA |  |
| (*c*) If relevant, consider translating estimates of relative risk into absolute risk for a meaningful time period | NA |  |

Continued on next page

| Other analyses | 17 | Report other analyses done—eg analyses of subgroups and interactions, and sensitivity analyses | 10-11 | Relationship Between Participants’ Digital Game Addiction and Emotion Regulation Subdimensions Scores  Predictors of Emotion Regulation Subdimensions and Duration of Technological Use on The Likelihood of Digital Game Addiction |
| --- | --- | --- | --- | --- |
| Discussion | | | | |
| Key results | 18 | Summarise key results with reference to study objectives | 11-14 | The initial findings revealed that digital game addiction scores did not significantly differ according to age, gender, grade level, number of siblings, or parental education levels.  In terms of daily technology use, 63.2% of the children in our sample reported using technology for 0–2 hours per day, while 17.5% used it for three or more hours.  There were no significant relationship found between the parental education level and digital game addiction in our study.  In our study, it was found that children who used technology for more than four hours per day had significantly lower scores on the anger subdimension compared to those who used it for shorter durations (p < .01).  Our study found statistical negative correlations between digital game addiction and all subdimensions of emotion regulation. |
| Limitations | 19 | Discuss limitations of the study, taking into account sources of potential bias or imprecision. Discuss both direction and magnitude of any potential bias | 15 | This study has several limitations. First, the study’s design limits the ability to establish causal relationships between emotion regulation and digital game addiction. Second, the sample was drawn from a single school in one geographic location, which limits the generalizability of the results to broader populations. Third, all data were collected through self-report measures completed by children, which may introduce response biases such as social desirability or inaccurate self-assessment. |
| Interpretation | 20 | Give a cautious overall interpretation of results considering objectives, limitations, multiplicity of analyses, results from similar studies, and other relevant evidence | 11-15 |  |
| Generalisability | 21 | Discuss the generalisability (external validity) of the study results | 15 | The sample was drawn from a single school in one geographic location, which limits the generalizability of the results to broader populations. |
| Other information | |  | | |
| Funding | 22 | Give the source of funding and the role of the funders for the present study and, if applicable, for the original study on which the present article is based | NA |  |

*Give information separately for cases and controls in case-control studies and, if applicable, for exposed and unexposed groups in cohort and cross-sectional studies.

**Note:** An Explanation and Elaboration article discusses each checklist item and gives methodological background and published examples of transparent reporting. The STROBE checklist is best used in conjunction with this article (freely available on the Web sites of PLoS Medicine at http://www.plosmedicine.org/, Annals of Internal Medicine at http://www.annals.org/, and Epidemiology at http://www.epidem.com/). Information on the STROBE Initiative is available at www.strobe-statement.org.
